# Supplementary material for: Access to a stabilized i-motif DNA structure through four successive ligation reactions on a cyclopeptide scaffold
Source: Royal Society of Chemistry journal article supplement (doi:10.1039/d0ob01311k), 2020-01-01
Supplement: d0ob01311k1.pdf [file d0ob01311k1.pdf]

## Supporting Information

### **Access to a stabilized *i*-motif DNA structure through four successive ligation reactions on a cyclopeptide scaffold**

Alexandre Devaux, Laureen Bonnat, Thomas Lavergne and Eric Defrancq

#### **Table of contents**

|                                   |     |
|-----------------------------------|-----|
| Abbreviations:.....               | S2  |
| General details: .....            | S2  |
| Peptides Synthesis: .....         | S3  |
| Oligonucleotides synthesis: ..... | S8  |
| Conjugates synthesis: .....       | S12 |
| Circular Dichroism studies: ..... | S25 |

## 1. Abbreviations

**Alloc:** Allyloxycarbonyl; **Boc:** tert-butoxycarbonyl; **CD:** Circular Dichroism; **CPG:** Controlled Pore Glass; **CuAAC:** Copper Catalyzed Alkyne-Azide Cycloaddition; **DCM:** dichloromethane; **Dde:** bis-N-[1-(4,4-dimethyl-2,6-dioxocyclohexylidene)ethyl]; **DIEA:** diisopropylamine; **DMF:** dimethylformamide; **DTT:** dithiothreitol; **EDTA:** Ethylenediaminetetraacetic acid; **Eei:** *N* $\epsilon$ -ethoxyethylidene; **ESI-MS:** Electrospray Ionization Mass Spectrometry; **ISAHC:** imidazole-1-sulfonylazide hydrochloride **MALDI-Tof-MS:** Matrix Assisted Laser Desorption Ionization - Time of Flight Mass Spectrometry; **OL:** oxime ligation; **PBS:** phosphate buffer saline; **RP-HPLC:** Reverse-Phase High Performance Liquid Chromatography; **Rt:** Retention time; **SEC:** Size Exclusion Chromatography; **SPOS:** solid-phase oligonucleotide syntheses; **SPPS:** solid-phase peptide synthesis; **TC:** thiol-iodoacetamide SN2 reaction; **TCEP:** tris(2-carboxyethyl)phosphine, **TFA:** trifluoroacetic acid; **THPTA:** Tris-(hydroxypropyltriazolylmethyl)amine; **TIS:** triisopropylsilane; **Tm:** melting temperature; **TRIS:** 2-amino-2-hydroxymethyl-propane-1,3-diol; **UPLC:** Ultra Performance Liquid Chromatography; **UV:** Ultraviolet.

## 2. General details

ESI mass spectra were performed on an Esquire 3000 spectrometer from Bruker or on an Acquity UPLC/MS system from Waters equipped with a SQ Detector 2 within a column heater set at 60°C. MALDI-Tof mass spectra were performed on an Autoflex Bruker using hydropiccolinic acid (HPA, 45 mg; ammonium citrate 4 mg in 500  $\mu$ L H<sub>2</sub>O/CH<sub>3</sub>CN) as matrix. Peptides were analyzed in positive mode and oligonucleotides and conjugates in negative mode. The mass spectra display either the relative abundance of ion signals (total ion counts) against the *m/z* ratios or the total ion counts against the *m/z* ratios. All solvents and reagents used were of highest purity commercially available.

### 3. Peptide synthesis

#### General details

The synthesis was performed on a Syro II synthesizer using Fmoc/tBu strategy on a 2-Chlorotrityl resin.

The courses of the reactions were monitored by using UPLC system Waters, it includes reverse phase chromatography using Nucleosil C18 column (130 Å, 2.1 x 50 mm, 1.7 µm) and detection by UV at 214 nm and 250 nm. A 0.6 mL/min flow linear gradient from 95% solvent A (0.1% formic acid in water) and 5% solvent B (0.1% formic acid in acetonitrile) to 100% B for 3 minutes was applied. The purified products were analyzed by the same UPLC system and the chromatograms display the UV absorbance at 214 nm against time.

RP-HPLC purifications were performed on a Gilson system with Nucleosil C18 column (100 Å, 250 x 21 mm, 7 µm) with UV monitoring at 214 nm and 250 nm. A 22 mL/min flow linear gradient was applied from 95% solvent A (0.1% formic acid in water) and 5% solvent B (0.1% formic acid in acetonitrile) to 100% B for 15 minutes.

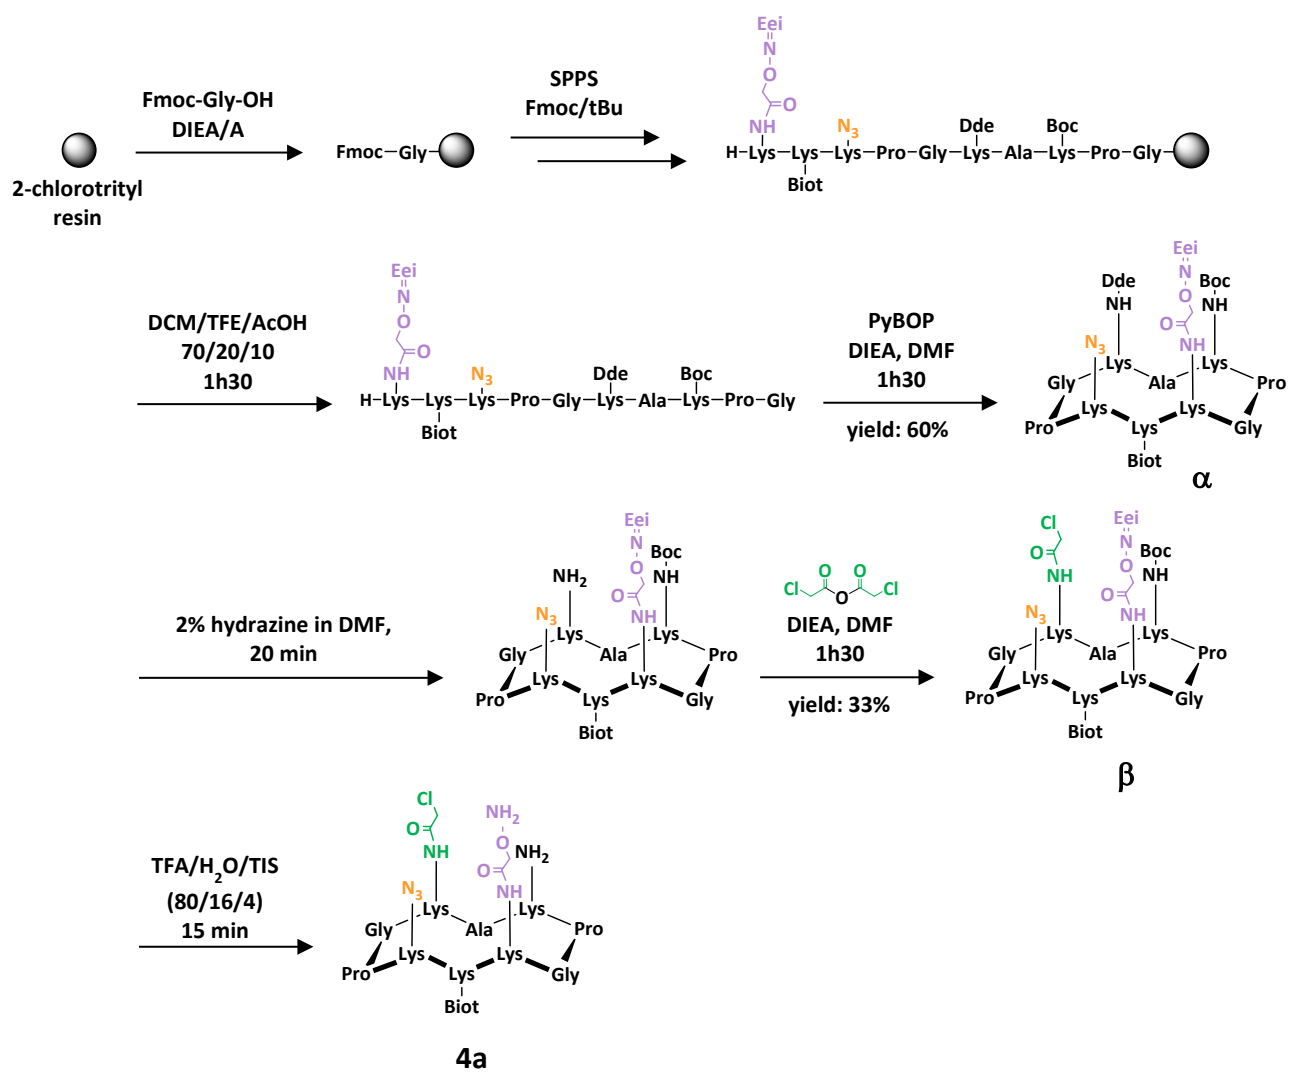

Scheme S1. Synthesis of peptide 4a.

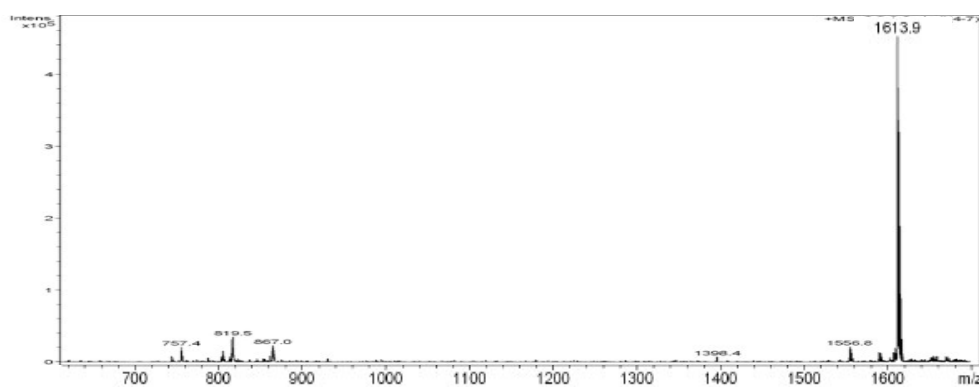

**Figure S1.** ESI mass spectrum of intermediate peptide  $\beta$ : ESI-MS (+):  $m/z$  calcd for  $C_{70}H_{116}N_{20}O_{18}SCl$ : 1591.8,  $m/z$  found: 1613.9  $[M+Na]^+$ .

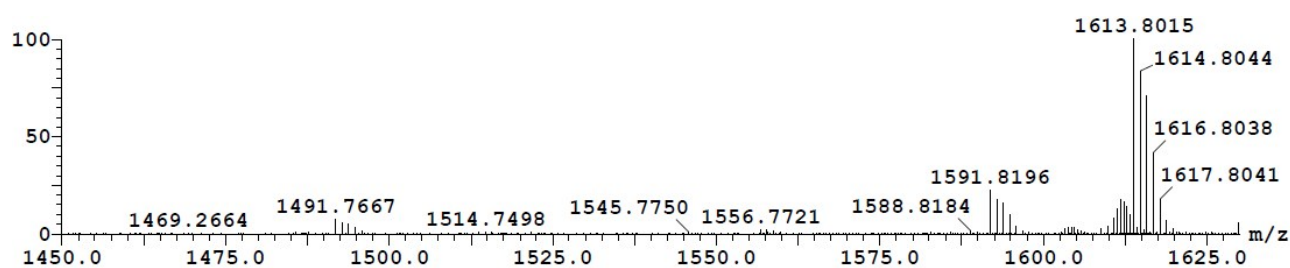

**Figure S2.** HR-ESI mass spectrum of intermediate peptide  $\beta$ : ESI-MS (+):  $m/z$  calcd for  $C_{70}H_{116}N_{20}O_{18}SCl$ : 1591.8186,  $m/z$  found: 1591.8196.

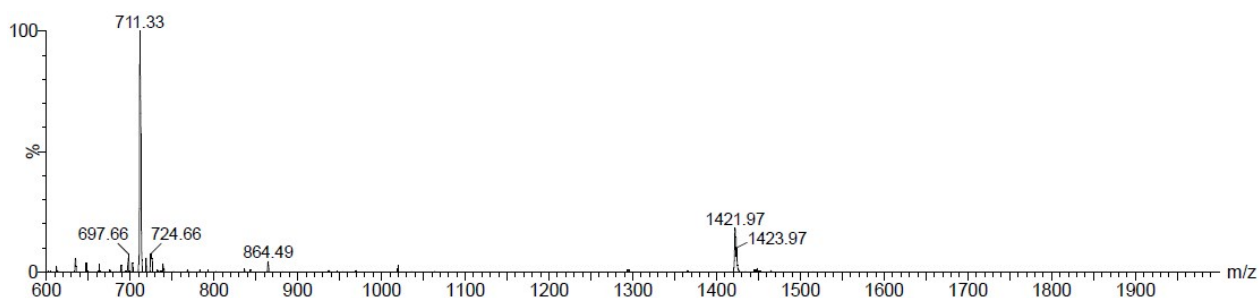

**Figure S3.** ESI mass spectrum of peptide **4a** ESI-MS (+):  $m/z$  calcd for  $C_{61}H_{102}N_{20}O_{15}SCl$ : 1421.7,  $m/z$  found: 1421.9  $[M+H]^+$ .

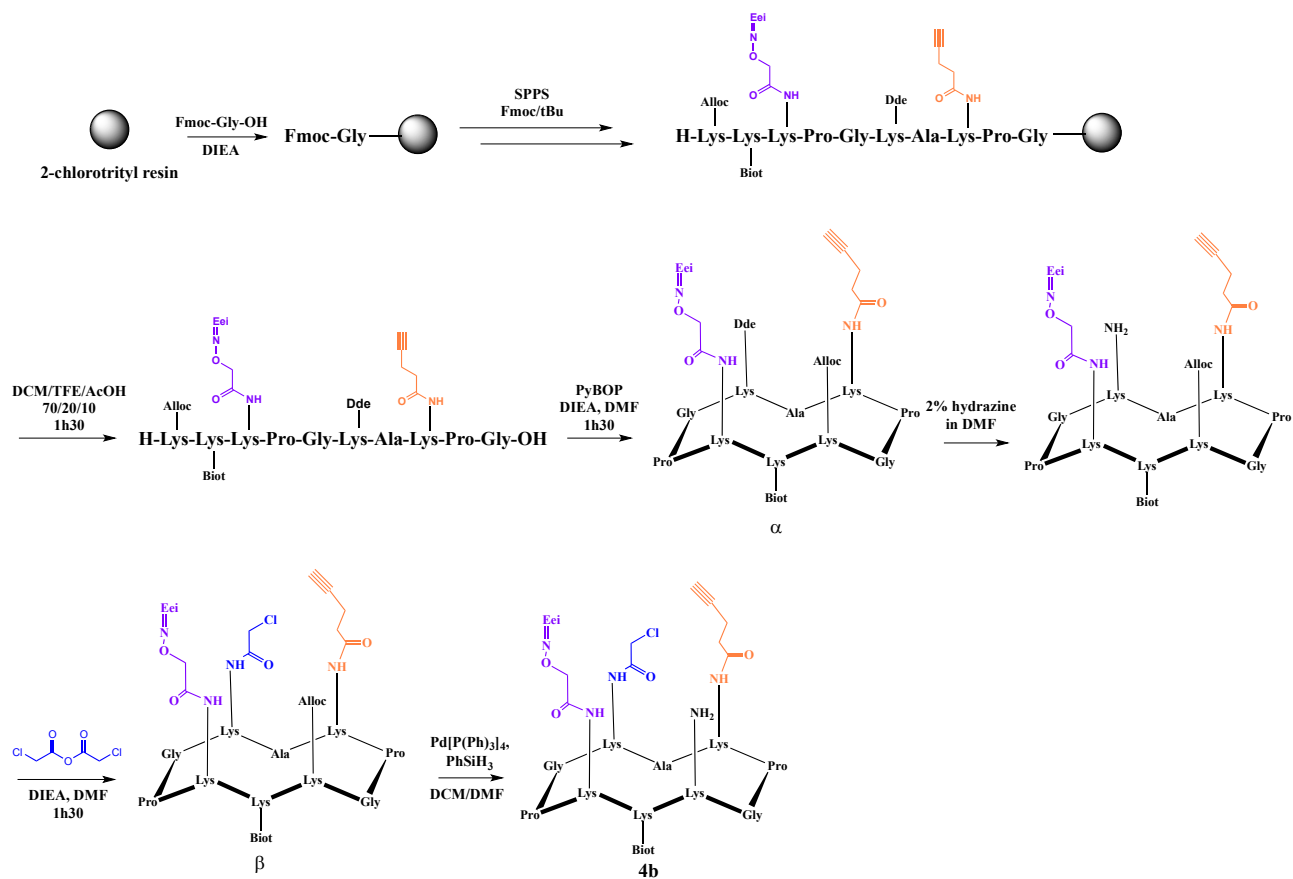

Scheme S2. Synthesis of peptide **4b**.

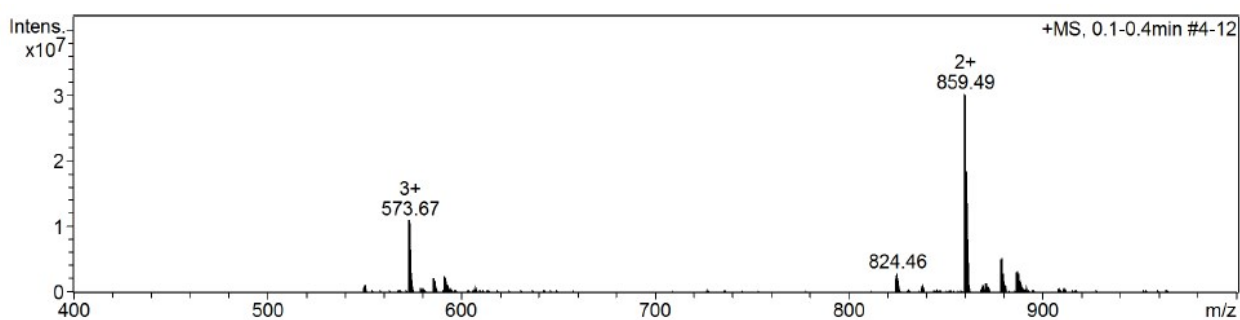

**Figure S4.** ESI mass spectrum of intermediate  $\alpha$  : ESI-MS (+):  $m/z$  calcd for  $C_{82}H_{128}N_{18}O_{20}S$ : 1716.92,  $m/z$  found: 1716.97  $[M+H]^+$ .

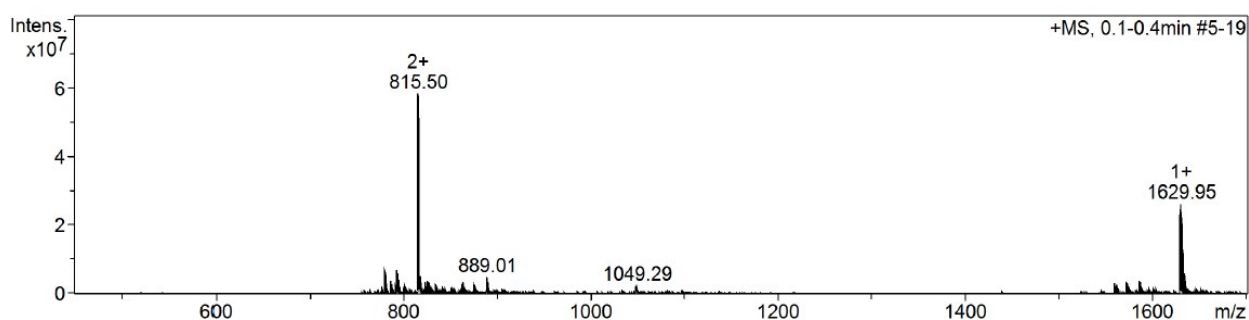

**Figure S5.** ESI mass spectrum of intermediate  $\beta$ : ESI-MS (+):  $m/z$  calcd for  $C_{74}H_{118}N_{18}O_{19}S$ : 1629.34,  $m/z$  found: 1629.95  $[M+H]^+$ .

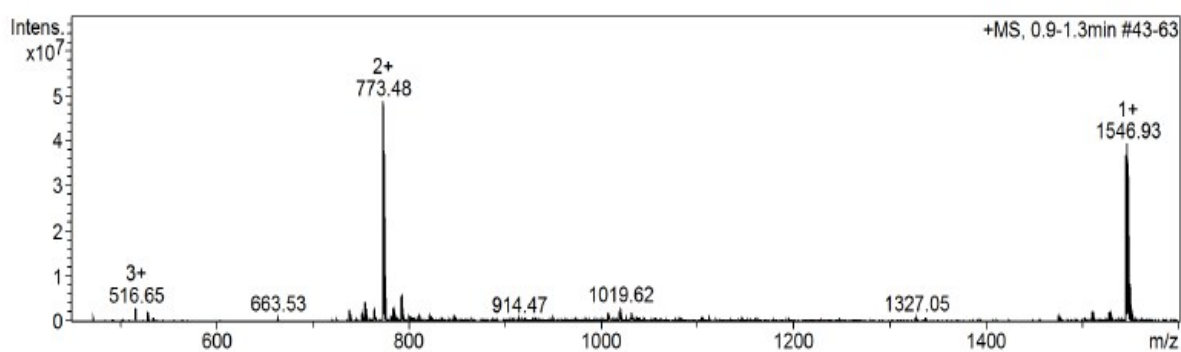

**Figure S6.** ESI mass spectrum of peptide **4b**: ESI-MS (+):  $m/z$  calcd for  $C_{70}H_{115}N_{18}O_{17}S$ : 1546.27,  $m/z$  found: 1546.93  $[M+H]^+$ .

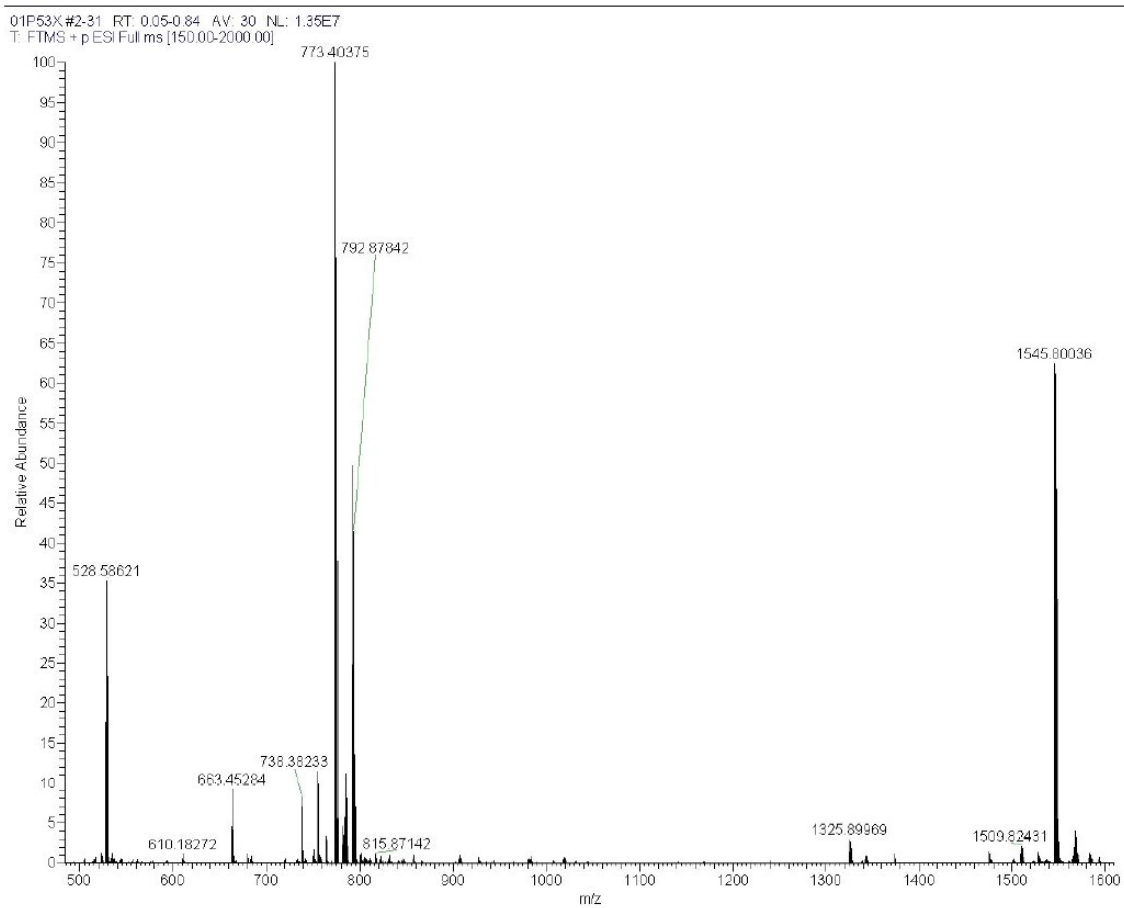

**Figure S7.** ESI mass spectrum of peptide **4b**: ESI-HRMS (+):  $m/z$  calcd for  $C_{70}H_{114}N_{18}O_{17}SCl$ : 1545.8018,  $m/z$  found: 1545.8003 [M]<sup>+</sup>.



## 4. Oligonucleotide synthesis

### General details

Oligonucleotides were prepared using  $\beta$ -cyanoethylphosphoramidite chemistry on a 3400 DNA synthesizer at 1  $\mu$ mol scale.

RP-HPLC analyses were performed on a Waters HPLC system using C18 Nucleosil column (Macherey-Nagel, 100 Å, 250 x 4.6 mm, 5  $\mu$ m) with UV-monitoring at 260 nm and 280 nm. A 1 mL/min flow linear gradient was applied. Solvent A (50 mM triethylammonium acetate buffer with 5% acetonitrile) and solvent B (acetonitrile with 5% water) were used. A stepwise gradient of 0-30% B in 20 min then from 30 to 100% B in 10 min was applied for the gradient. The RP-HPLC purifications of oligonucleotides were performed on a Gilson system with Nucleosil C-18 column (Macherey-Nagel, 100 Å, 250 x 10 mm, 7  $\mu$ m) with UV-monitoring at 260 nm and 280 nm using 4 mL/min flow linear gradient. A stepwise gradient of 0-30% B in 20 min then from 30 to 100% B in 10 min was applied.

Desalting of oligonucleotides was performed by SEC on NAP 25 cartridge using manufacturer's protocol.

Quantification of oligonucleotides was performed at 260 nm using Nanodrop apparatus (molar extinction  $\epsilon_{260\text{nm}}$  was estimated according to the nearest neighbor model).

### a) Synthesis of oligonucleotide 2

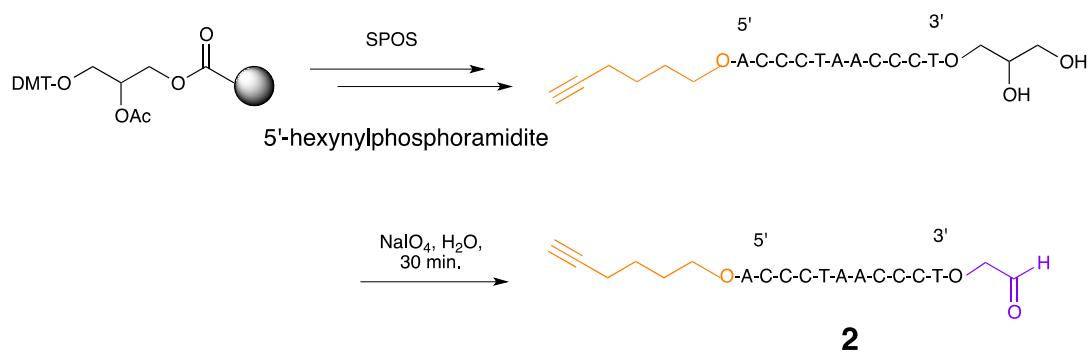

**Scheme S3.** Synthesis of oligonucleotide 2.

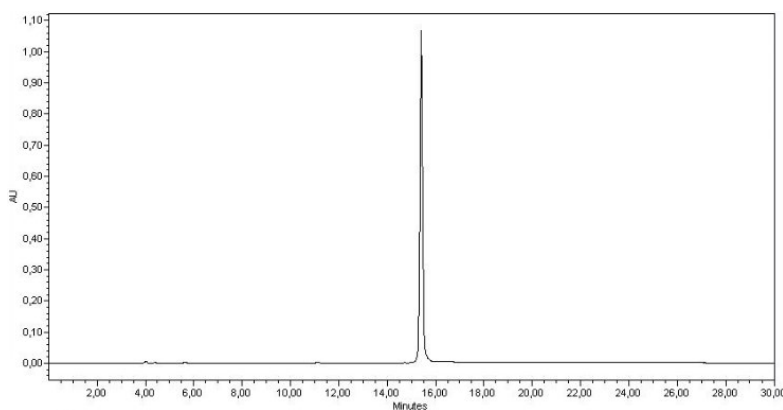

**Figure S8.** RP-HPLC chromatogram of pure oligonucleotide 2.

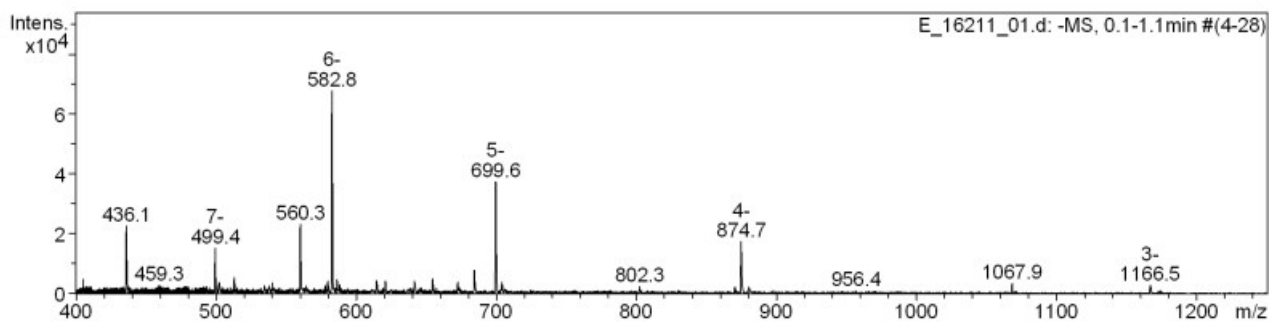

**Figure S9.** ESI mass spectrum of oligonucleotide 2. ESI-MS (-):  $m/z$  calcd for  $\text{C}_{112}\text{H}_{148}\text{N}_{37}\text{O}_{70}\text{P}_{12}$ : 3502.60,  $m/z$  found: 3502.68 [M-H]<sup>-</sup>.

## b) Synthesis of oligonucleotide 3

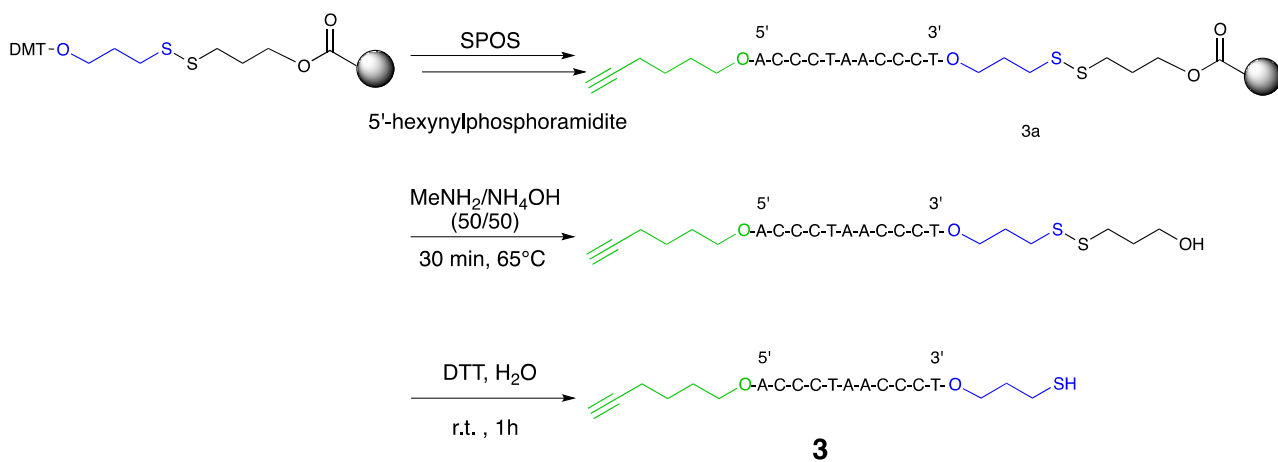

**Scheme S4.** Synthesis of oligonucleotide **3**.

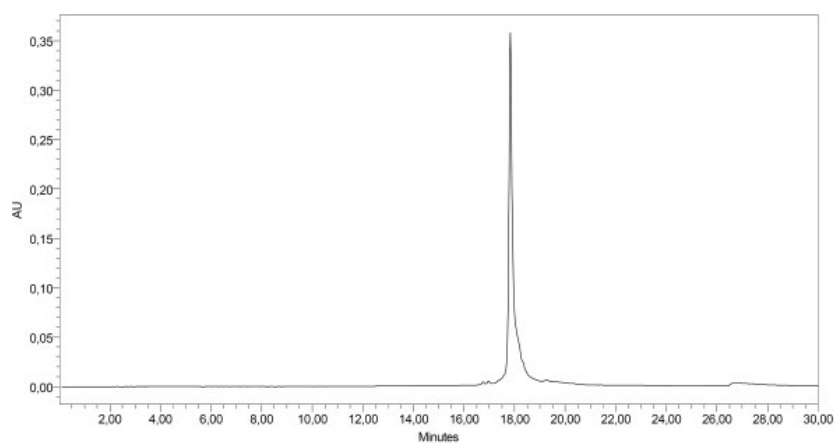

**Figure S10.** RP-HPLC chromatogram of pure oligonucleotide **3**.

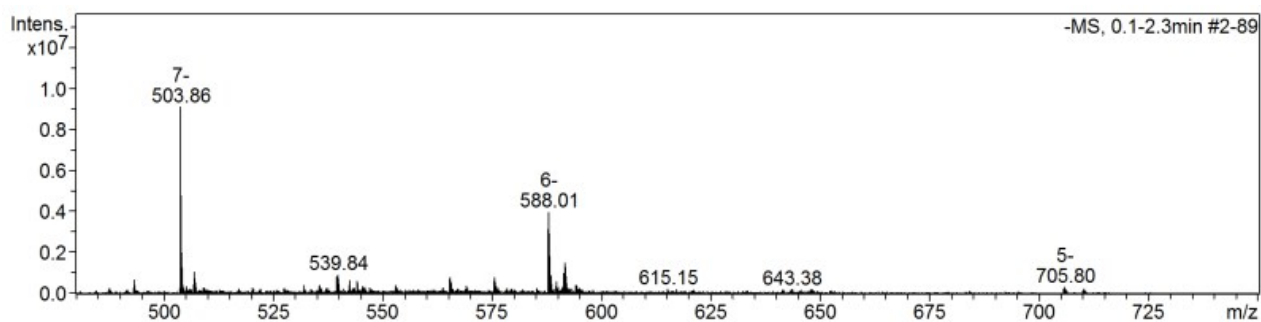

**Figure S11.** ESI mass spectrum of oligonucleotide **3**. ESI-MS (-):  $m/z$  calcd for  $\text{C}_{113}\text{H}_{151}\text{N}_{37}\text{O}_{69}\text{P}_{12}\text{S}$ : 3534.4,  $m/z$  found: 3534.9 [M-H]<sup>-</sup>.

### c) Synthesis of oligonucleotide 10

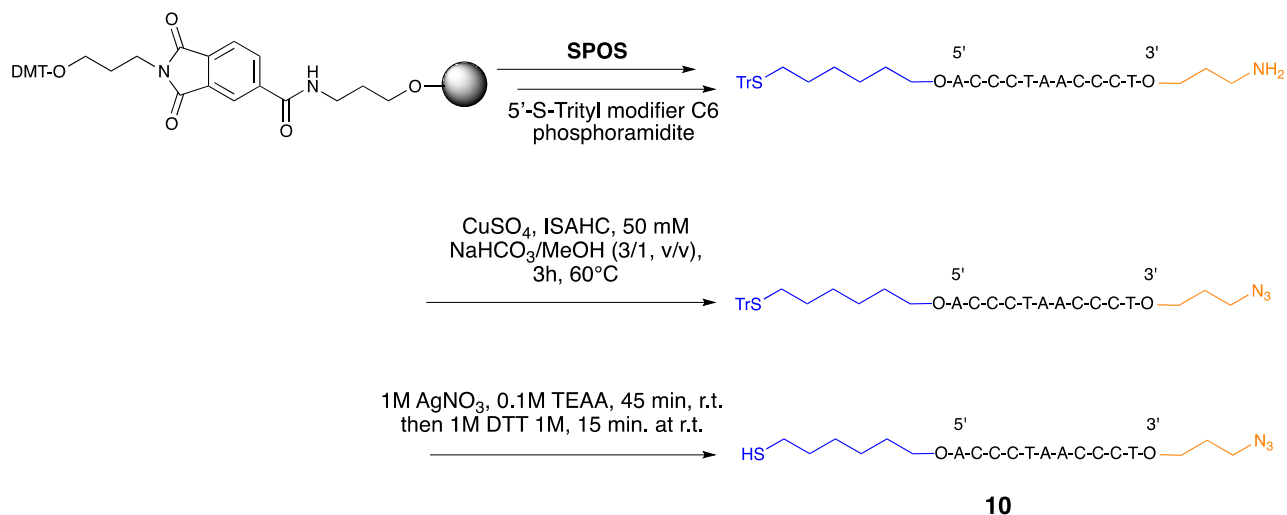

**Scheme S5.** Synthesis of oligonucleotide **10**.

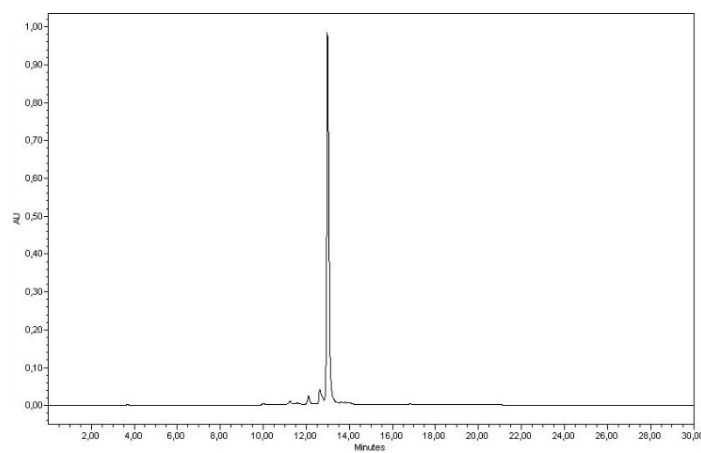

**Figure S12.** RP-HPLC chromatogram of oligonucleotide **10**.

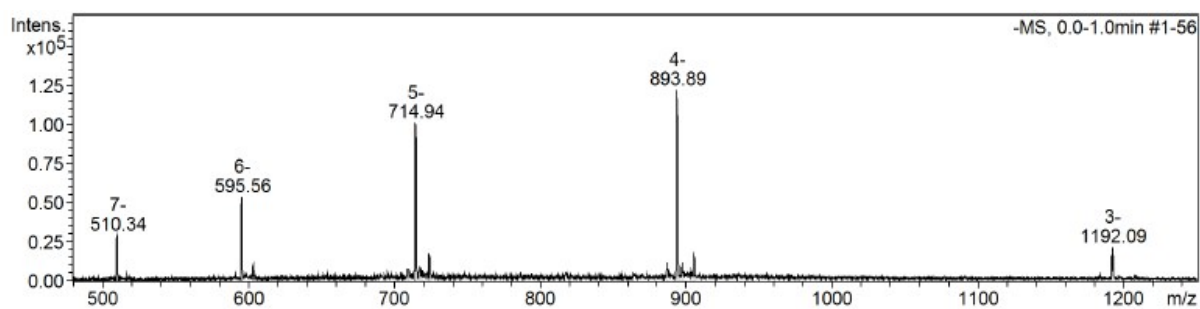

**Figure S13.** ESI mass spectrum of oligonucleotide **10**. ESI-MS (-):  $m/z$  calcd for C<sub>113</sub>H<sub>155</sub>N<sub>40</sub>O<sub>69</sub>P<sub>12</sub>S: 3579.63,  $m/z$  found: 3579.58 [M-H]<sup>-</sup>.

## 5. Conjugates synthesis

### General details

RP-HPLC analyses were performed on a Waters HPLC system using C18 Nucleosil column (Macherey-Nagel, 100 Å, 250 x 4.6 mm, 5 µm) with UV-monitoring at 260 nm and 280 nm. A 1 mL/min flow linear gradient was applied. Solvent A (50 mM triethylammonium acetate buffer with 5% acetonitrile) and solvent B (acetonitrile with 5% water) were used. Two gradients have been used: gradient I (0-30% B in 30 minutes) and gradient II (0-50% B in 30 minutes).

The course of reactions were monitored by using UPLC-MS system Waters, it includes reverse phase chromatography using Nucleosil C18 column (130 Å, 2.1 x 50 mm, 1.7 µm) equipped with a column heater set at 60°C and detection by UV at 260 nm and 280 nm and by electron spray ionization mass spectrometry. A 0.3 mL/min flow linear gradient with solvent C (triethylamine (15mM) and hexafluoro-2-propanol (50mM) in water) and solvent D (triethylamine (15mM) and hexafluoro-2-propanol (50mM) in methanol) was used.

The RP-HPLC purifications of conjugates were performed on a Gilson system with Nucleosil C-18 column (Macherey-Nagel, 100 Å, 250 x 10 mm, 7 µm) with UV-monitoring at 260 nm and 280 nm using 4 mL/min flow linear gradient. Solvent A (50 mM triethylammonium acetate buffer with 5% acetonitrile) and solvent B (acetonitrile with 5% water) were used.

a) Synthesis of conjugate 5

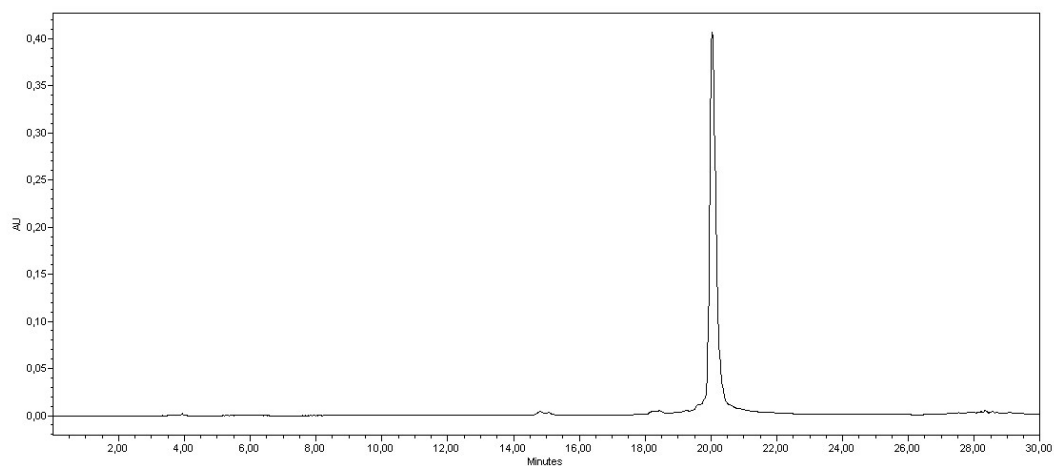

Figure S14. RP-HPLC chromatogram of conjugate 5 (oxime ligation).

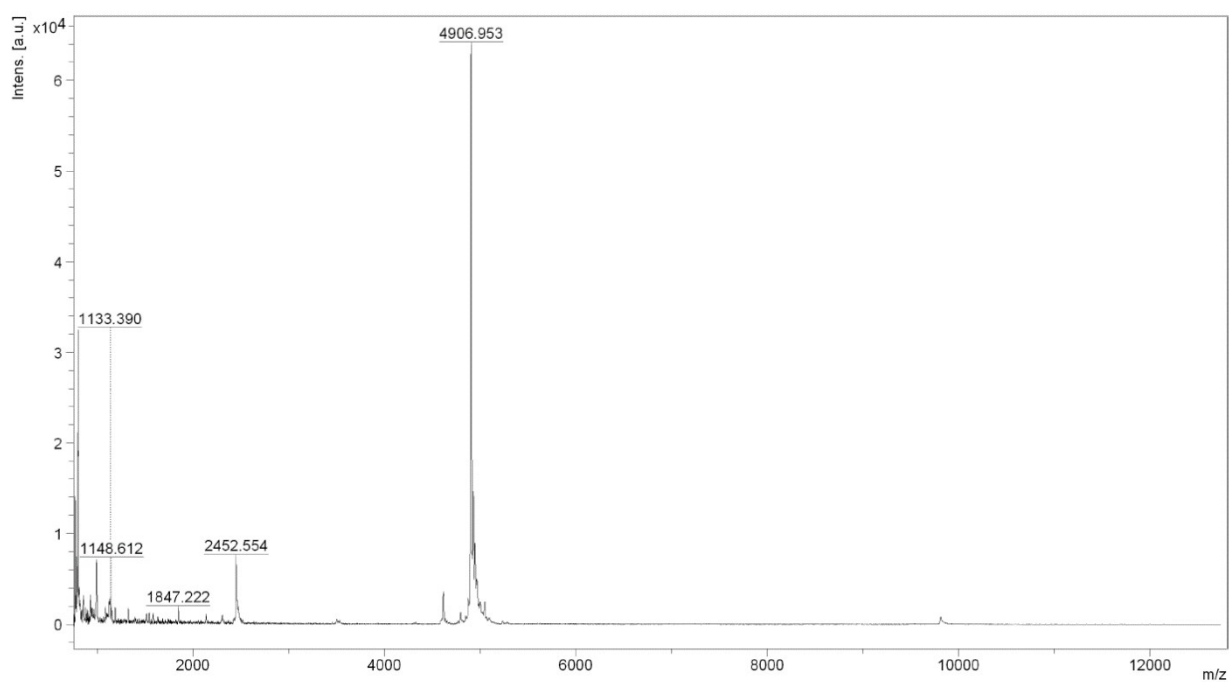

Figure S15. MALDI-ToF-MS mass spectrum of oligonucleotide 5. MALDI-MS (-):  $m/z$  calcd for  $C_{173}H_{245}N_{57}O_{84}P_{12}S$ : 4906.3,  $m/z$  found: 4906.9 [M-H]<sup>-</sup>.

## b) Synthesis of conjugate 6

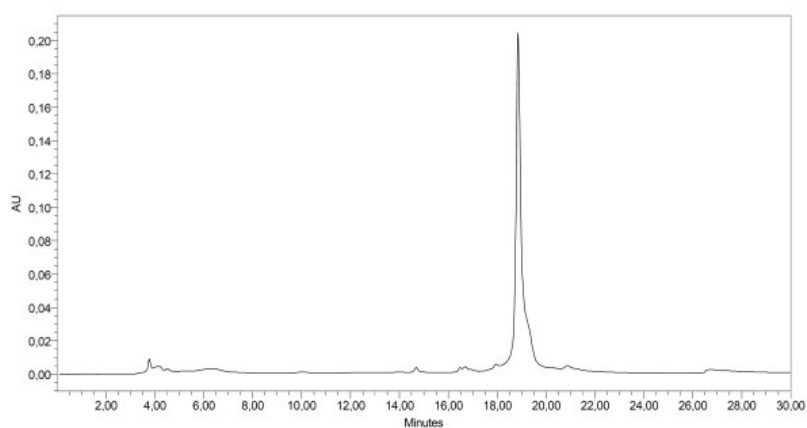

**Figure S16.** RP-HPLC chromatogram of conjugate 6 (*CuAAC* reaction).

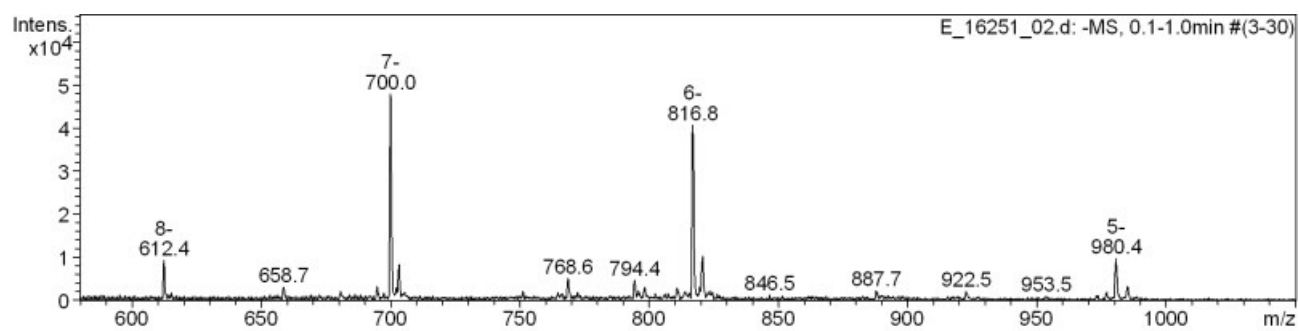

**Figure S17.** ESI mass spectrum of oligonucleotide 6. ESI-MS (-):  $m/z$  calcd for  $C_{173}H_{245}N_{57}O_{84}P_{12}S_1Cl_1$ : 4906.3,  $m/z$  found: 4907.2 [M-H]<sup>-</sup>.

c) Synthesis of conjugate 7

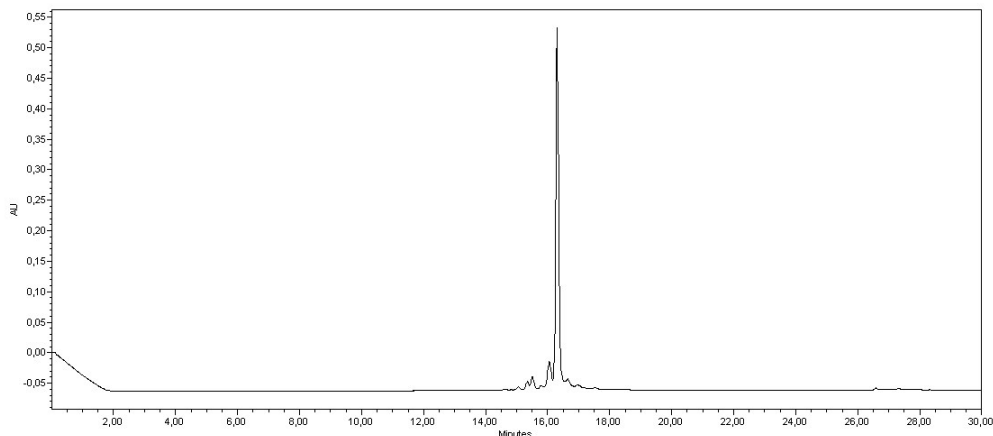

Figure S18. RP-HPLC chromatogram of conjugate 7 (TC reaction).

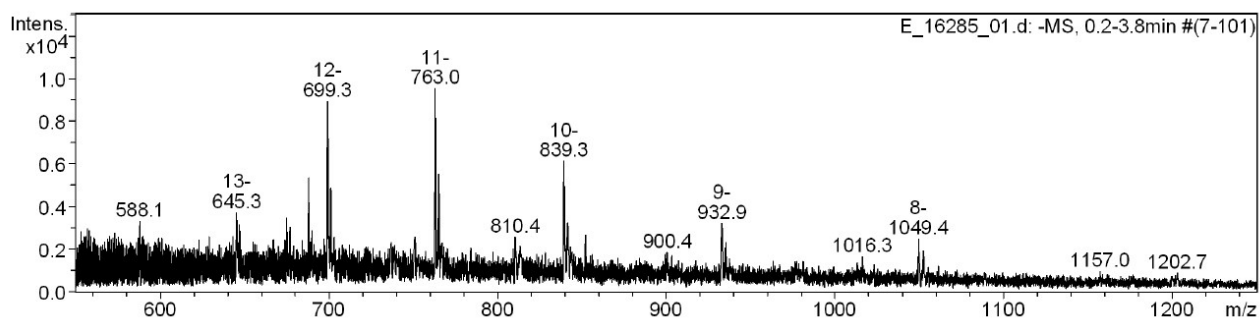

Figure S19. ESI mass spectrum of oligonucleotide 7. ESI-MS (-):  $m/z$  calcd for  $C_{286}H_{395}N_{94}O_{153}P_{24}S_2$ : 8405.2,  $m/z$  found: 8403.5 [M-H]<sup>-</sup>.



d) Synthesis of conjugate 8

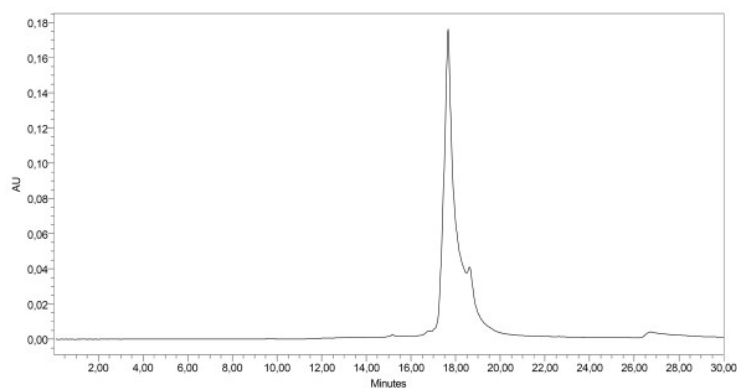

Figure S20. RP-HPLC chromatogram of conjugate 8.

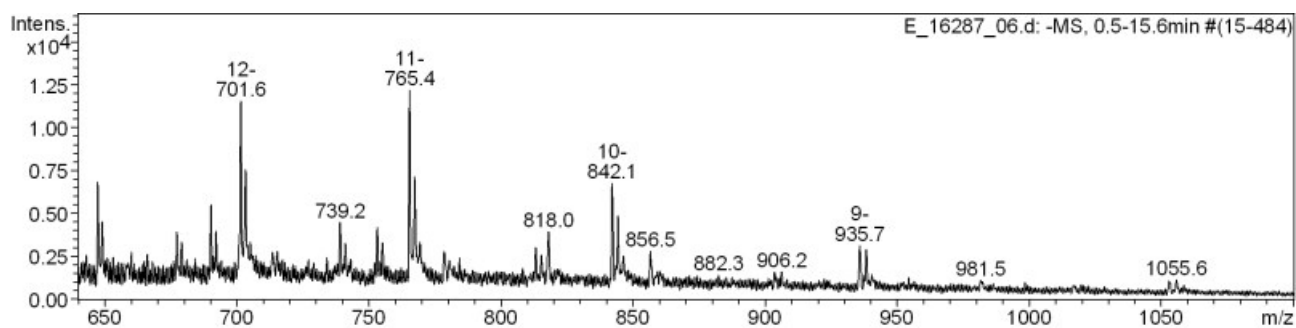

Figure S21. ESI mass spectrum of oligonucleotide 8. ESI-MS (-):  $m/z$  calcd for  $C_{286}H_{393}N_{96}O_{153}P_{24}S_2$ : 8430.8,  $m/z$  found: 8433.8 [M-H]<sup>-</sup>.

e) Synthesis of conjugate 9

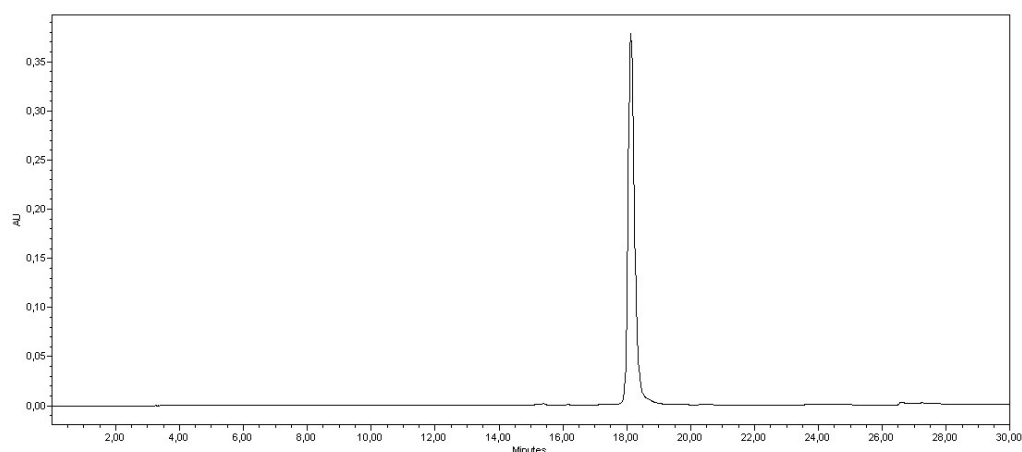

Figure S22. RP-HPLC chromatogram of conjugate 9 (diazo transfer reaction).

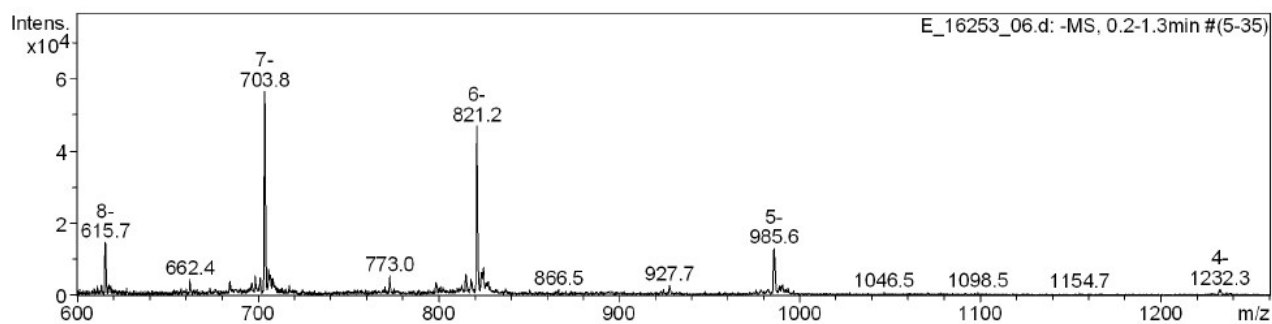

Figure S23. ESI mass spectrum of oligonucleotide 9. ESI-MS (-):  $m/z$  calcd for  $C_{173}H_{243}N_{59}O_{84}P_{12}Cl$ : 4932.3,  $m/z$  found: 4934.4 [M-H]<sup>-</sup>.

f) Synthesis of conjugate 11

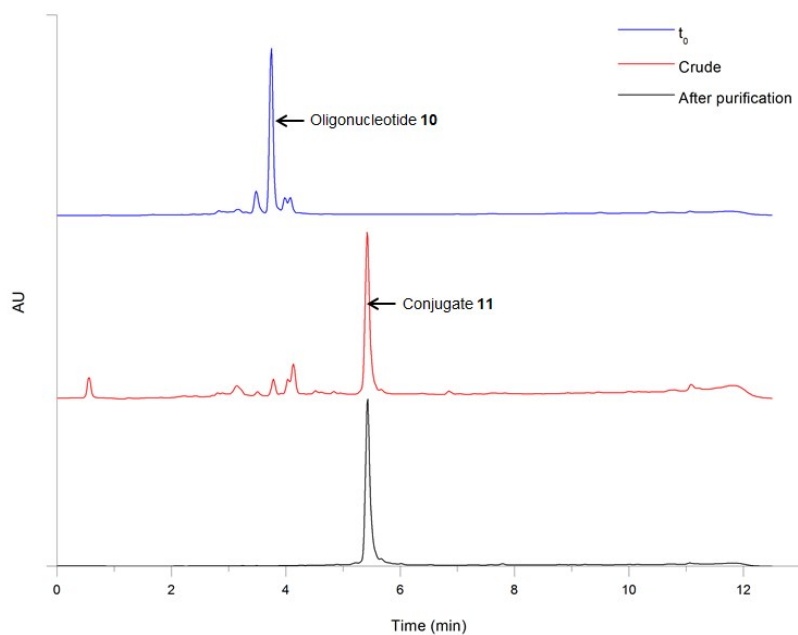

**Figure S24.** Reaction monitoring (UPLC-MS, negative mode) of the formation of conjugate 11 from oligonucleotide 10 (TC reaction).

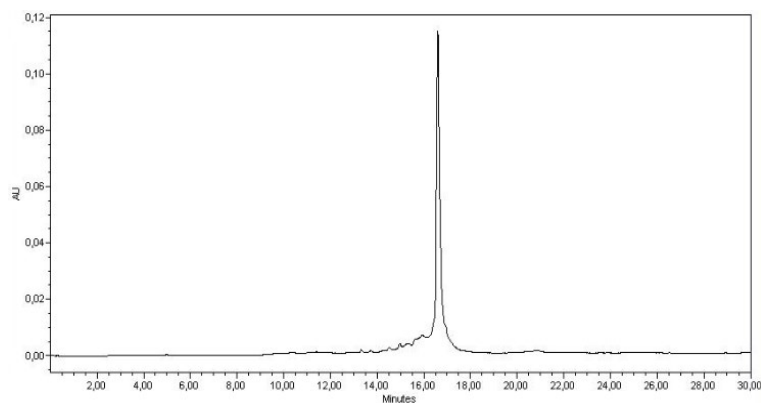

**Figure S25.** RP-HPLC chromatogram of pure conjugate 11.

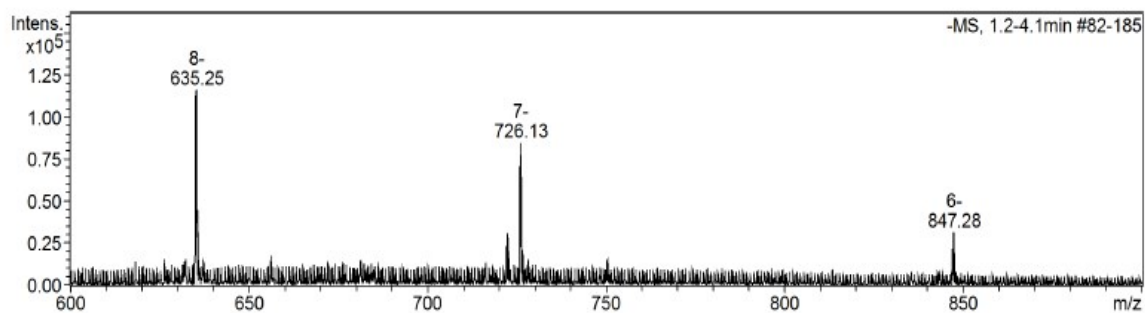

**Figure S26.** ESI mass spectrum of conjugate 11: ESI-MS (-):  $m/z$  calcd  $C_{183}H_{268}N_{58}O_{86}P_{12}S_2$ : 5089.46,  $m/z$  found: 5089.68 [M-H]<sup>-</sup>.

### g) Synthesis of conjugate **12**

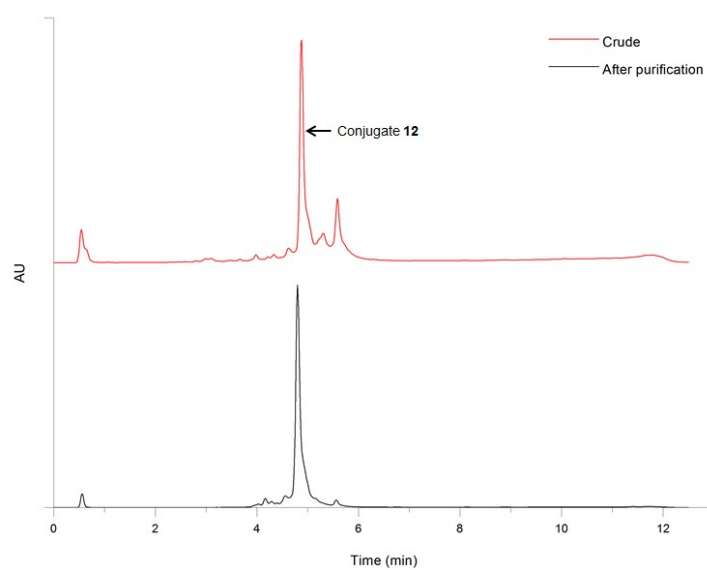

**Figure S27.** Reaction monitoring (UPLC-MS, negative mode) of the formation of conjugate **12** from **11** (CuAAC reaction).

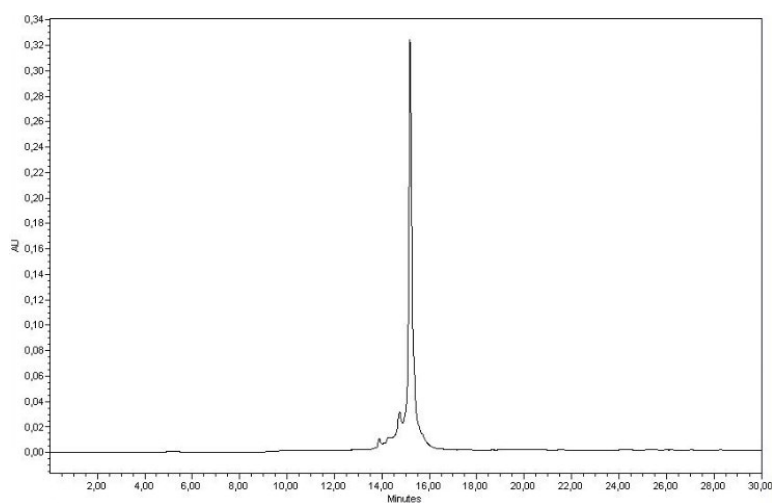

**Figure S28.** RP-HPLC chromatogram of pure conjugate **12**.

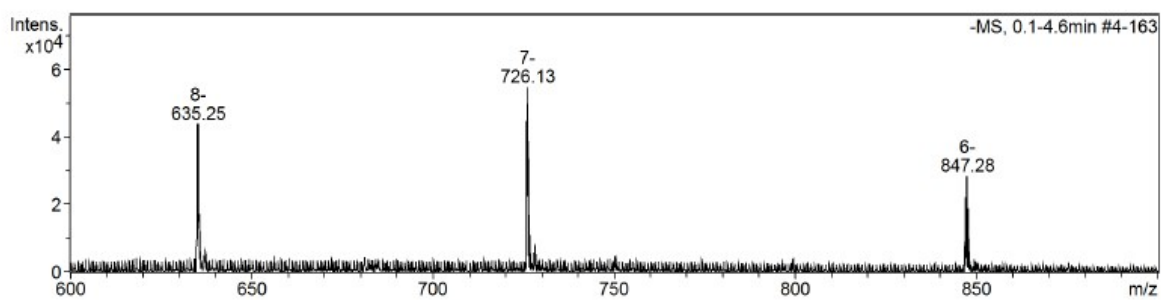

**Figure S29.** ESI mass spectrum of conjugate **12**: ESI-MS (-):  $m/z$  calcd  $C_{183}H_{268}N_{58}O_{86}P_{12}S_2$ : 5089.46,  $m/z$  found: 5089.62 [M-H]<sup>-</sup>.

## h) Synthesis of conjugate 13

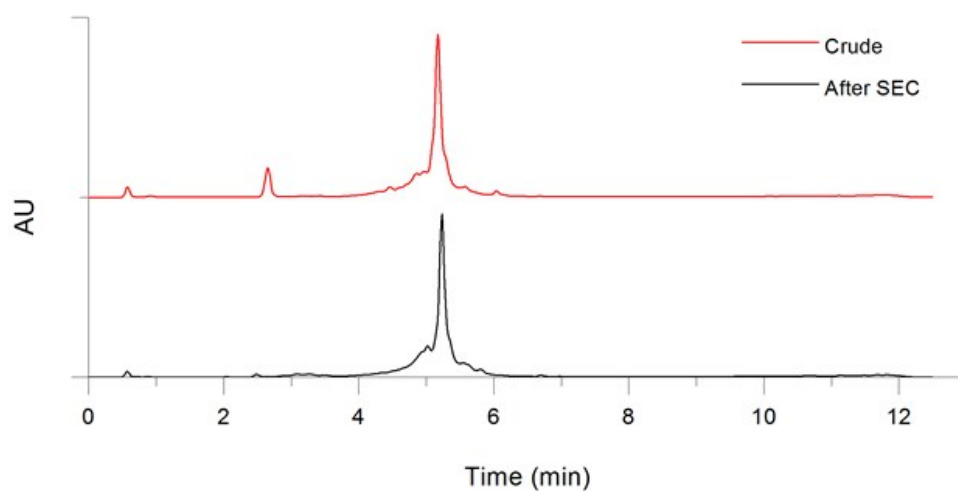

**Figure S30.** Reaction monitoring (UPLC-MS, negative mode) of the formation of conjugate **13** from **12** (diazo transfer reaction).

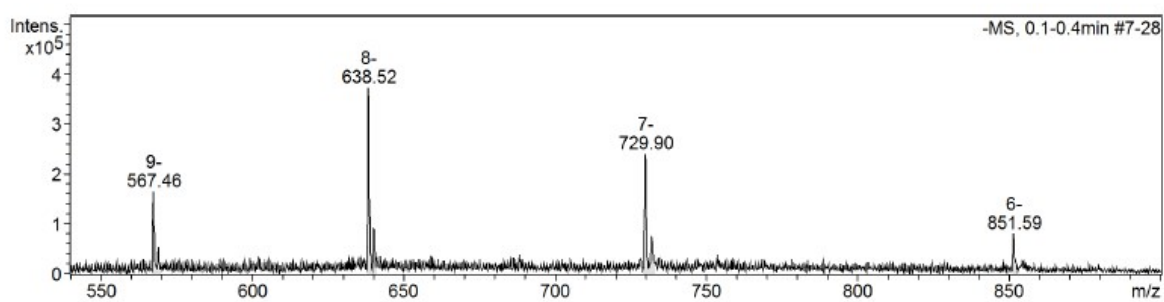

**Figure S31.** ESI mass spectrum of conjugate **13**: ESI-MS (-):  $m/z$  calcd  $C_{183}H_{267}N_{60}O_{86}P_{12}S_2$ : 5116.45,  $m/z$  found: 5116.21  $[M-H]^-$ .

i) Synthesis of conjugate 14

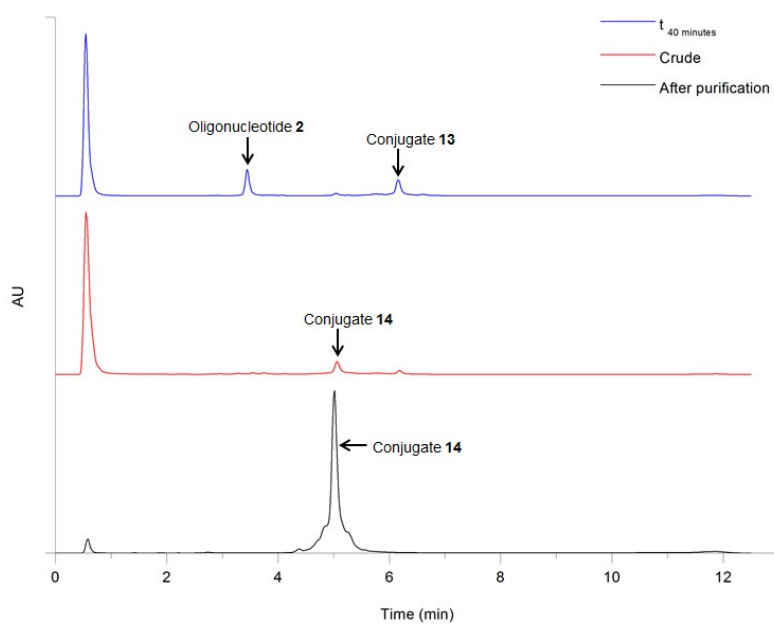

**Figure S32.** Reaction monitoring (UPLC-MS, negative mode) of the formation of conjugate **14** from **13** (CuAAC reaction).

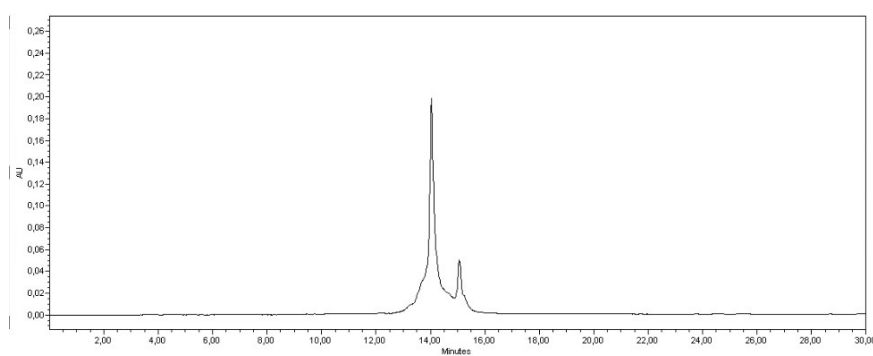

**Figure S33.** RP-HPLC chromatogram of pure conjugate **14**.

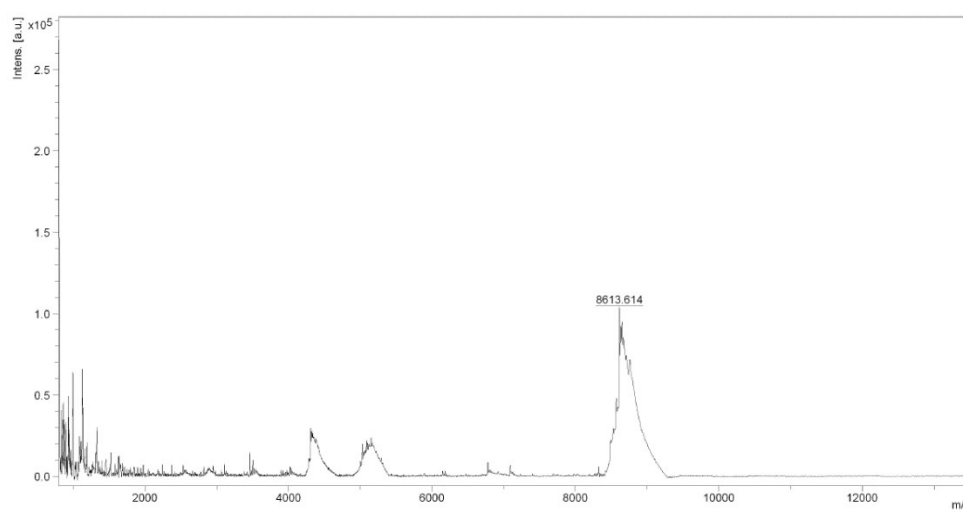

**Figure S34.** MALDI-ToF mass spectrum of conjugate **14**. MALDI-ToF-MS (-):  $m/z$  calcd  $C_{295}H_{413}N_{97}O_{156}P_{24}S_2$ : 8617.05,  $m/z$  found: 8613.61 [M-H]<sup>-</sup>.

## j) Synthesis of conjugate **1b**

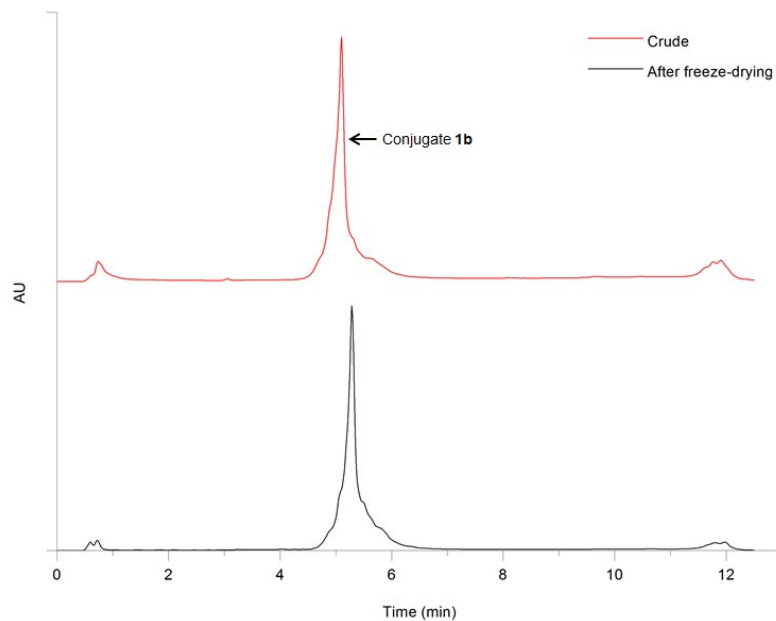

**Figure S35.** Reaction monitoring (UPLC-MS, negative mode, 60°C ) of the formation of conjugate **1b** from **14** (*oxime ligation*). The top chromatogram is the crude reaction. The bottom chromatogram is the pure conjugate **1b** after Size Exclusion filtration (NAP 25 cartridge) and freeze-drying to remove volatile TFA reagent and the water byproduct and solvent. The UPLC was performed at 60°C in conditions where **1b** do not form the i-motif topology.

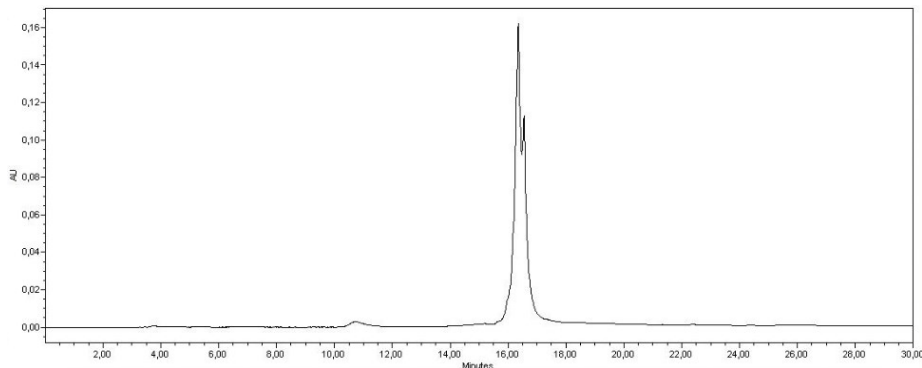

**Figure S36.** RP-HPLC chromatogram of conjugate **1b** at room temperature. This chromatogram shows two peaks which corresponds to a mixture of conformers, one peak corresponding to the folded i-motif structure and the other to one or more unfolded forms of the conjugate **1b**.

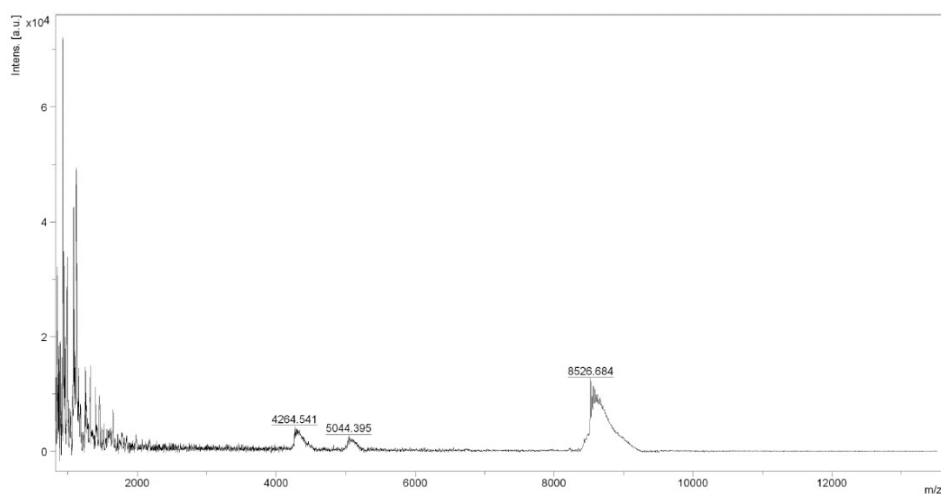

**Figure S37.** MALDI-ToF mass spectrum of conjugate **1b**: MALDI-ToF-MS (-):  $m/z$  calcd  $C_{291}H_{405}N_{97}O_{154}P_{24}S_2$ : 8528.99,  $m/z$  found: 8526.68 [M-H]<sup>-</sup>.

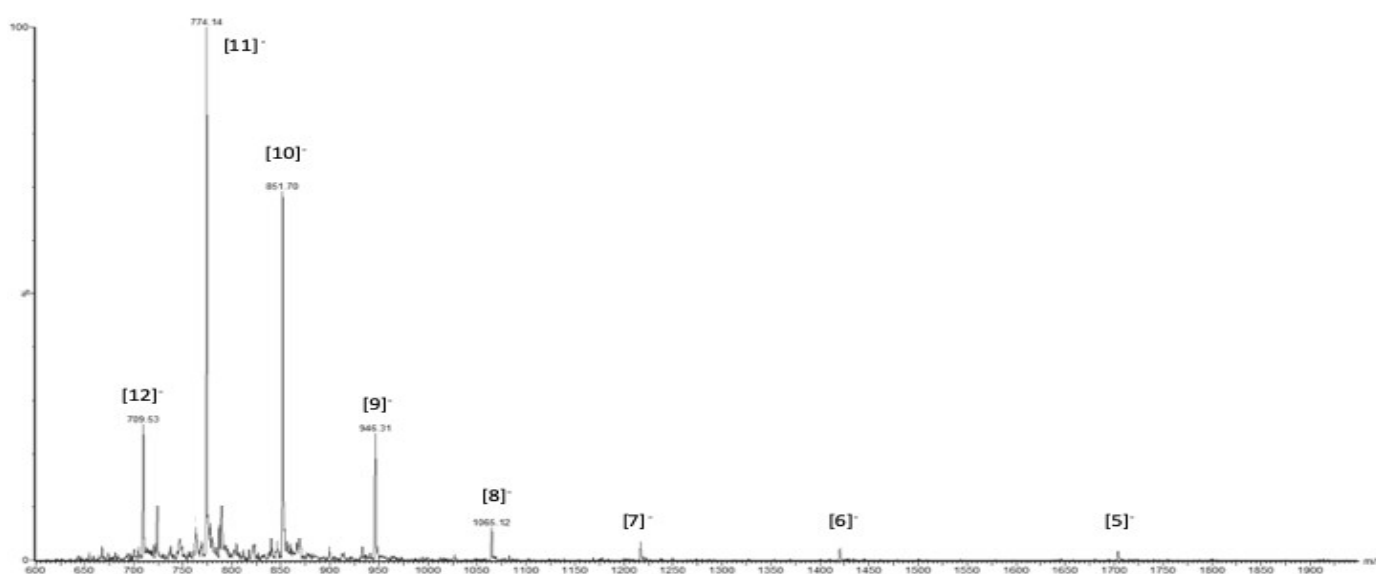

**Figure S38.** mass spectrum of conjugate **1b** from LC-MS analysis:  $m/z$  calcd  $C_{291}H_{405}N_{97}O_{154}P_{24}S_2$ : 8528.99,  $m/z$  found: 8528.00 [M-H]<sup>-</sup>.



## 6. Circular Dichroism studies

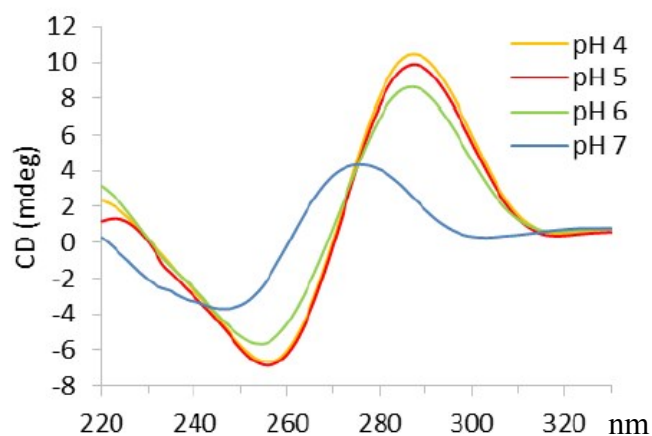

**Figure S39.** CD spectra of conjugate **8** at different pH (PBS buffer) at room temperature.

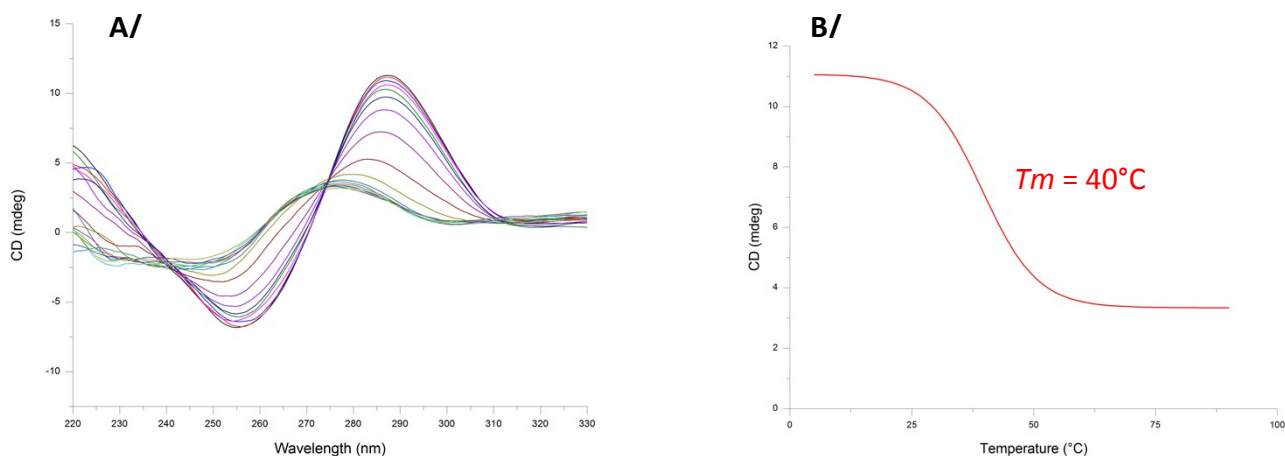

**Figure S40.** **A/** Raw CD traces for conjugate **1b** (2  $\mu$ M) in 10 mM PBS buffer at pH 6, Temperature varied from 5°C to 90°C, **B/** CD signal intensities at  $\lambda_{\max}$  versus temperature.

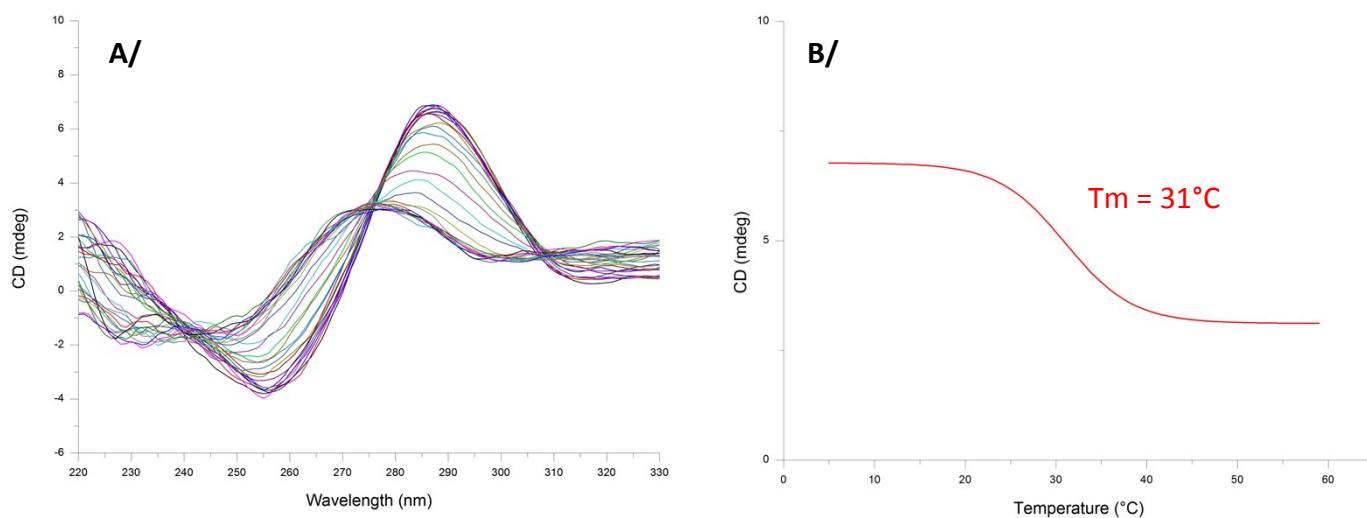

**Figure S41.** **A/** Conjugate **1b** (2  $\mu$ M) in 10 mM PBS buffer at pH 7, Temperature varied from 5°C to 60°C. **B/** CD signal intensities at  $\lambda_{\max}$  versus temperature.
